# Supplementary material for: Development and internal validation of a depression severity prediction model for tinnitus patients based on questionnaire responses and socio-demographics
Source: PubMed Central journal article supplement (PMC7069984; doi:10.1038/s41598-020-61593-z), 2020-03-13
Supplement: 41598_2020_61593_MOESM1_ESM.pdf [file 41598_2020_61593_MOESM1_ESM.pdf]

## –Supplementary Material–

# Development and internal validation of a depression severity prediction model for tinnitus patients based on questionnaire responses and socio-demographics

Uli Niemann<sup>1\*</sup>, Petra Brueggemann<sup>2</sup>, Benjamin Boecking<sup>2</sup>, Birgit Mazurek<sup>2</sup>, and Myra Spiliopoulou<sup>1</sup>

<sup>1</sup>*Faculty of Computer Science, Otto-von-Guericke University Magdeburg, Universitätsplatz 2, Magdeburg 39106, Germany*

<sup>2</sup>*Tinnitus Center, Charité Universitaetsmedizin, Charitéplatz 1, Berlin 10117, Germany*

\*Corresponding author: [uli.niemann@ovgu.de](mailto:uli.niemann@ovgu.de)

### Supplementary A: feature overview

Table 1 lists all 185 features that were used for classifier training. These features were extracted from direct question answers or derived scores and measurements from 7 questionnaires: [a] Long Form General Depression Scale [1, 2] (ADSL), [b] Perceived Stress Questionnaire [3] (PSQ), [c] Short Form 8 Health Survey [4] (SF8), [d] German version of the Tinnitus Questionnaire [5] (TQ), [e] Tinnitus Localisation and Quality [6] (TLQ), [f] visual analogue scales measuring tinnitus loudness, frequency and distress (TINSKAL), and [g] a sociodemographics questionnaire [7] (SOZK).

| No | Feature     | Description                                                                                                  |
|----|-------------|--------------------------------------------------------------------------------------------------------------|
| 1  | ADSL_adsl01 | “During the past week I was bothered by things that usually don’t bother me.”                                |
| 2  | ADSL_adsl02 | “During the past week I did not feel like eating; my appetite was poor.”                                     |
| 3  | ADSL_adsl03 | “During the past week I felt that I could not shake off the blues even with help from my family or friends.” |
| 4  | ADSL_adsl04 | “During the past week I felt I was just as good as other people.”                                            |
| 5  | ADSL_adsl05 | “During the past week I had trouble keeping my mind on what I was doing.”                                    |
| 6  | ADSL_adsl06 | “During the past week I felt depressed.”                                                                     |
| 7  | ADSL_adsl07 | “During the past week I felt that everything I did was an effort.”                                           |
| 8  | ADSL_adsl08 | “During the past week I felt hopeful about the future.”                                                      |
| 9  | ADSL_adsl09 | “During the past week I thought my life had been a failure.”                                                 |
| 10 | ADSL_adsl10 | “During the past week I felt fearful.”                                                                       |
| 11 | ADSL_adsl11 | “During the past week my sleep was restless.”                                                                |
| 12 | ADSL_adsl12 | “During the past week I was happy.”                                                                          |
| 13 | ADSL_adsl13 | “During the past week I talked less than usual.”                                                             |
| 14 | ADSL_adsl14 | “During the past week I felt lonely.”                                                                        |
| 15 | ADSL_adsl15 | “During the past week people were unfriendly.”                                                               |
| 16 | ADSL_adsl16 | “During the past week I enjoyed life.”                                                                       |
| 17 | ADSL_adsl17 | “During the past week I had crying spells.”                                                                  |

Continued on next page

| No | Feature            | Description                                                                 |
|----|--------------------|-----------------------------------------------------------------------------|
| 18 | ADSL_adsl18        | “During the past week I felt sad.”                                          |
| 19 | ADSL_adsl19        | “During the past week I felt that people disliked me.”                      |
| 20 | ADSL_adsl20        | “During the past week I could not get going.”                               |
| 21 | ADSL_lie           | Lie detection score                                                         |
| 22 | ADSL_timestamp     | ADSL: avg. time needed to fill an item (in secs)                            |
| 23 | age                | patient age                                                                 |
| 24 | PSQ_demand         | demand score                                                                |
| 25 | PSQ_joy            | joy score                                                                   |
| 26 | PSQ_stress         | stress sum score                                                            |
| 27 | PSQ_stress01       | “You feel rested.”                                                          |
| 28 | PSQ_stress02       | “You feel that too many demands are being made on you.”                     |
| 29 | PSQ_stress03       | “You are irritable or grouchy.”                                             |
| 30 | PSQ_stress04       | “You have too many things to do.”                                           |
| 31 | PSQ_stress05       | “You feel lonely or isolated.”                                              |
| 32 | PSQ_stress06       | “You find yourself in situations of conflict.”                              |
| 33 | PSQ_stress07       | “You feel you’re doing things you really like.”                             |
| 34 | PSQ_stress08       | “You feel tired.”                                                           |
| 35 | PSQ_stress09       | “You fear you may not manage to attain your goals.”                         |
| 36 | PSQ_stress10       | “You feel calm.”                                                            |
| 37 | PSQ_stress11       | “You have too many decisions to make.”                                      |
| 38 | PSQ_stress12       | “You feel frustrated.”                                                      |
| 39 | PSQ_stress13       | “You are full of energy.”                                                   |
| 40 | PSQ_stress14       | “You feel tense.”                                                           |
| 41 | PSQ_stress15       | “Your problems seem to be piling up.”                                       |
| 42 | PSQ_stress16       | “You feel you’re in a hurry.”                                               |
| 43 | PSQ_stress17       | “You feel safe and protected.”                                              |
| 44 | PSQ_stress18       | “You have many worries.”                                                    |
| 45 | PSQ_stress19       | “You are under pressure from other people.”                                 |
| 46 | PSQ_stress20       | “You feel discouraged.”                                                     |
| 47 | PSQ_stress21       | “You enjoy yourself.”                                                       |
| 48 | PSQ_stress22       | “You are afraid for the future.”                                            |
| 49 | PSQ_stress23       | “You feel you’re doing things because you have to not because you want to.” |
| 50 | PSQ_stress24       | “You feel criticised or judged.”                                            |
| 51 | PSQ_stress25       | “You are lighthearted.”                                                     |
| 52 | PSQ_stress26       | “You feel mentally exhausted.”                                              |
| 53 | PSQ_stress27       | “You have trouble relaxing.”                                                |
| 54 | PSQ_stress28       | “You feel loaded down with responsibility.”                                 |
| 55 | PSQ_stress29       | “You have enough time for yourself.”                                        |
| 56 | PSQ_stress30       | “You feel under pressure from deadlines.”                                   |
| 57 | PSQ_tension        | tension score                                                               |
| 58 | PSQ_timestamp      | PSQ: avg. time needed to fill an item (in secs)                             |
| 59 | PSQ_worries        | worries score                                                               |
| 60 | SF8_bodily_health  | Bodily pain score                                                           |
| 61 | SF8_emotional      | Role emotional score                                                        |
| 62 | SF8_genhealth      | General health score                                                        |
| 63 | SF8_mental         | Mental health summary score                                                 |
| 64 | SF8_mentalhealth   | Mental health score                                                         |
| 65 | SF8_physical       | Role physical score                                                         |
| 66 | SF8_physicalfunc   | Physical functioning score                                                  |
| 67 | SF8_physicalhealth | Physical health summary score                                               |

Continued on next page

| No  | Feature           | Description                                                                                                                                          |
|-----|-------------------|------------------------------------------------------------------------------------------------------------------------------------------------------|
| 68  | SF8_sf01          | “Overall, how would you rate your health during the past week?”                                                                                      |
| 69  | SF8_sf02          | “During the past 4 weeks, how much did physical health problems limit your physical activities (such as walking or climbing stairs)?”                |
| 70  | SF8_sf03          | “During the past 4 weeks, how much difficulty did you have doing your daily work, both at home and away from home, because of your physical health?” |
| 71  | SF8_sf04          | “How much bodily pain have you had during the past 4 weeks?”                                                                                         |
| 72  | SF8_sf05          | “During the past 4 weeks, how much energy did you have?”                                                                                             |
| 73  | SF8_sf06          | “During the past 4 weeks, how much did your physical health or emotional problems limit your usual social activities with family or friends?”        |
| 74  | SF8_sf07          | “During the past 4 weeks, how much have you been bothered by emotional problems (...) ?”                                                             |
| 75  | SF8_sf08          | “During the past 4 weeks, how much did personal or emotional problems keep you from doing your usual work, school or other daily activities?”        |
| 76  | SF8_social        | Social functioning score                                                                                                                             |
| 77  | SF8_timestamp     | SF8: avg. time needed to fill an item (in secs)                                                                                                      |
| 78  | SF8_vitality      | Vitality score                                                                                                                                       |
| 79  | SOZK_abitur       | Graduation: “Abitur”                                                                                                                                 |
| 80  | SOZK_civservant   | Occupation: civil servant                                                                                                                            |
| 81  | SOZK_divorced     | Divorced                                                                                                                                             |
| 82  | SOZK_employee     | Occupation: employee                                                                                                                                 |
| 83  | SOZK_fachabitur   | Graduation: “Fachabitur”                                                                                                                             |
| 84  | SOZK_gender       | Male gender                                                                                                                                          |
| 85  | SOZK_geselle      | Graduation: “Geselle”                                                                                                                                |
| 86  | SOZK_graduate     | Graduation: university                                                                                                                               |
| 87  | SOZK_ill          | “How long have you been ill during the last 12 months? (in months)”                                                                                  |
| 88  | SOZK_job          | Job status: currently employed                                                                                                                       |
| 89  | SOZK_lowersec     | Graduation: lower secondary school                                                                                                                   |
| 90  | SOZK_married      | Married                                                                                                                                              |
| 91  | SOZK_meister      | Graduation: “Meister”                                                                                                                                |
| 92  | SOZK_mittlereife  | Graduation: “mittlere Reife”                                                                                                                         |
| 93  | SOZK_nationality  | German nationality                                                                                                                                   |
| 94  | SOZK_nograd       | Graduation: none                                                                                                                                     |
| 95  | SOZK_nophysicians | “How many physicians have you visited because of your current complaints?”                                                                           |
| 96  | SOZK_occupother   | Occupation: other                                                                                                                                    |
| 97  | SOZK_partnership  | In partnership                                                                                                                                       |
| 98  | SOZK_psychotreat  | “How long have you been in psychotherapeutic treatment? (in months)”                                                                                 |
| 99  | SOZK_pupil        | Graduation: currently pupil or “Azubi”                                                                                                               |
| 100 | SOZK_selfempl     | Occupation: self-employed                                                                                                                            |
| 101 | SOZK_student      | Graduation: currently student                                                                                                                        |
| 102 | SOZK_timestamp    | SOZK: avg. time needed to fill an item (in secs)                                                                                                     |
| 103 | SOZK_tinnitusdur  | “How long have you been suffering from tinnitus (in years)?”                                                                                         |
| 104 | SOZK_unemp        | Duration of unemployment in the last 5 years                                                                                                         |
| 105 | SOZK_unmarried    | Unmarried                                                                                                                                            |
| 106 | SOZK_worker       | Occupation: worker                                                                                                                                   |
| 107 | TESTING_day       | testing date: day of the month                                                                                                                       |

Continued on next page

| No  | Feature            | Description                                                                         |
|-----|--------------------|-------------------------------------------------------------------------------------|
| 108 | TESTING_month      | testing date: month                                                                 |
| 109 | TESTING_week       | testing date: calendar week                                                         |
| 110 | TESTING_weekday    | testing date: day of the week                                                       |
| 111 | TESTING_yearday    | testing date: day of the year                                                       |
| 112 | TINSKAL_frequency  | Tinnitus frequency                                                                  |
| 113 | TINSKAL_impairment | Degree of tinnitus impairment                                                       |
| 114 | TINSKAL_loudness   | Tinnitus loudness                                                                   |
| 115 | TINSKAL_timestamp  | TINSKAL: avg. time needed to fill an item (in secs)                                 |
| 116 | TLQ_bothears       | The tinnitus is located in both ears.                                               |
| 117 | TLQ_entirehead     | The tinnitus is located in the entire head.                                         |
| 118 | TLQ_hissing        | Tinnitus noise: hissing                                                             |
| 119 | TLQ_leftear        | The tinnitus is located in the left ear.                                            |
| 120 | TLQ_rightear       | The tinnitus is located in the right ear.                                           |
| 121 | TLQ_ringing        | Tinnitus noise: ringing                                                             |
| 122 | TLQ_rustling       | Tinnitus noise: rustling                                                            |
| 123 | TLQ_timestamp      | TLQ: avg. time needed to fill an item (in secs)                                     |
| 124 | TLQ_whistling      | Tinnitus noise: whistling                                                           |
| 125 | TQ_audpercdiff     | Auditory perceptual difficulties score                                              |
| 126 | TQ_cogdistress     | Cognitive distress score                                                            |
| 127 | TQ_distress        | Total tinnitus distress score                                                       |
| 128 | TQ_emodistress     | Emotional distress score                                                            |
| 129 | TQ_intrusivness    | Intrusiveness score                                                                 |
| 130 | TQ_psychodistress  | Psychological distress score                                                        |
| 131 | TQ_sleepdisturb    | Sleep disturbances score                                                            |
| 132 | TQ_somaticcompl    | Somatic complaints score                                                            |
| 133 | TQ_timestamp       | TQ: avg. time needed to fill an item (in secs)                                      |
| 134 | TQ_tin01           | I can sometimes ignore the noises even when they are there.                         |
| 135 | TQ_tin02           | I am unable to enjoy listening to music because of the noises.                      |
| 136 | TQ_tin03           | It's unfair that I have to suffer with my noises.                                   |
| 137 | TQ_tin04           | I wake up more in the night because of my noises.                                   |
| 138 | TQ_tin05           | I am aware of the noises from the moment I get up to the moment I sleep.            |
| 139 | TQ_tin06           | Your attitude to the noise makes no difference to how it affects you.               |
| 140 | TQ_tin07           | Most of the time the noises are fairly quiet.                                       |
| 141 | TQ_tin08           | I worry that the noises will give me a nervous breakdown.                           |
| 142 | TQ_tin09           | Because of the noises I have difficulty in telling where sounds are coming from.    |
| 143 | TQ_tin10           | The way the noises sound is really unpleasant.                                      |
| 144 | TQ_tin11           | I feel I can never get away from the noises.                                        |
| 145 | TQ_tin12           | Because of the noises I wake up earlier in the morning.                             |
| 146 | TQ_tin13           | I worry whether I will be able to put up with this problem for ever.                |
| 147 | TQ_tin14           | Because of the noises it is more difficult to listen to several people at once.     |
| 148 | TQ_tin15           | The noises are loud most of the time.                                               |
| 149 | TQ_tin16           | Because of the noises I worry that there is something seriously wrong with my body. |
| 150 | TQ_tin17           | If the noises continue my life will not be worth living.                            |
| 151 | TQ_tin18           | I have lost some of my confidence because of the noises.                            |
| 152 | TQ_tin19           | I wish someone understood what this problem is like.                                |

Continued on next page

| No  | Feature  | Description                                                                          |
|-----|----------|--------------------------------------------------------------------------------------|
| 153 | TQ_tin20 | The noises distract me whatever I am doing.                                          |
| 154 | TQ_tin21 | There is very little one can do to cope with the noises.                             |
| 155 | TQ_tin22 | The noises sometimes give me a pain in the ear or head.                              |
| 156 | TQ_tin23 | When I feel low and pessimistic the noise seems worse.                               |
| 157 | TQ_tin24 | I am more irritable with my family and friends because of the noises.                |
| 158 | TQ_tin25 | Because of the noises I have tension in the muscles of my head and neck.             |
| 159 | TQ_tin26 | Because of the noises other people's voices sound distorted to me.                   |
| 160 | TQ_tin27 | It will be dreadful if these noises never go away.                                   |
| 161 | TQ_tin28 | I worry that the noises might damage my physical health.                             |
| 162 | TQ_tin29 | The noise seems to go right through my head.                                         |
| 163 | TQ_tin30 | Almost all my problems are caused by these noises.                                   |
| 164 | TQ_tin31 | Sleep is my main problem.                                                            |
| 165 | TQ_tin32 | It's the way you think about the noise - NOT the noise itself which makes you upset. |
| 166 | TQ_tin33 | I have more difficulty following a conversation because of the noises.               |
| 167 | TQ_tin34 | I find it harder to relax because of the noises.                                     |
| 168 | TQ_tin35 | My noises are often so bad that I cannot ignore them.                                |
| 169 | TQ_tin36 | It takes me longer to get to sleep because of the noises.                            |
| 170 | TQ_tin37 | I sometimes get very angry when I think about having the noises.                     |
| 171 | TQ_tin38 | I find it harder to use the telephone because of the noises.                         |
| 172 | TQ_tin39 | I am more liable to feel low because of the noises.                                  |
| 173 | TQ_tin40 | I am able to forget about the noises when I am doing something interesting.          |
| 174 | TQ_tin41 | Because of the noises life seems to be getting on top of me.                         |
| 175 | TQ_tin42 | I have always been sensitive about trouble with my ears.                             |
| 176 | TQ_tin43 | I often think about whether the noises will ever go away.                            |
| 177 | TQ_tin44 | I can imagine coping with the noises.                                                |
| 178 | TQ_tin45 | The noises never 'let up'.                                                           |
| 179 | TQ_tin46 | A stronger person might be better at accepting this problem.                         |
| 180 | TQ_tin47 | I am a victim of my noises.                                                          |
| 181 | TQ_tin48 | The noises have affected my concentration.                                           |
| 182 | TQ_tin49 | The noises are one of those problems in life you have to live with.                  |
| 183 | TQ_tin50 | Because of the noises I am unable to enjoy the radio or television.                  |
| 184 | TQ_tin51 | The noises sometimes produce a bad headache.                                         |
| 185 | TQ_tin52 | I have always been a light sleeper.                                                  |

Table 1: **Feature overview.** Overview of all 185 features which were used for classification. TQ: German version of the Tinnitus Questionnaire [5]; PSQ: Perceived Stress Questionnaire [3]; SF8: Short Form 8 Health Survey [4]; ADSL: General Depression Scale - long form [2]; SOZK: sociodemographics questionnaire; TINSKAL: visual analogue scales measuring tinnitus loudness, frequency and distress, TLQ: Tinnitus Localisation and Quality [6].

## Supplementary B: hyperparameter tuning

In this study, 11 classification algorithms were employed: LASSO [8] (`lasso`), RIDGE (`ridge`), weighted k-nearest neighbour classifier [9] (`wknn`), Naïve Bayes classifier (`nb`), support vector machine [10] (`svm`), a feed-forward neural network with one single hidden layer [11] (`nnet`), generalised partial least squares [12] (`gpls`), CART decision tree [13] (`cart`), C5.0 decision tree [14] (`c5.0`), random forest [15] (`rf`) and gradient boosted trees [16] (`gbt`).

All classifiers were implemented with the statistical programming language R [17] using the package `mlr`[18], which provides a consistent interface to many machine learning algorithms from other R packages. A grid search was employed for hyperparameter tuning using area under the ROC curve (AUC) as evaluation measure. Table 2 provides an overview about each classifier, including used R package, tuned hyperparameters and their value ranges. All other hyperparameters were set to default values.

| Algorithm (R package)                                                   | Hyperparameter                | Min       | Max       | #Values |
|-------------------------------------------------------------------------|-------------------------------|-----------|-----------|---------|
| <code>lasso</code> , <code>ridge</code> (both <code>glmnet</code> [19]) | <code>lambda</code>           | 0.01      | $10^{10}$ | 100     |
| <code>wknn</code> ( <code>kknn</code> [9])                              | <code>k</code>                | 1         | 77        | 20      |
| <code>svm</code> ( <code>e1071</code> [20])                             | <code>cost</code>             | 0.01      | 3         | 6       |
|                                                                         | <code>gamma</code>            | 0         | 3         | 4       |
|                                                                         | <code>kernel</code>           | *         | -         | 4       |
| <code>nb</code> ( <code>e1071</code> [20])                              | <code>laplace</code>          | 1         | 5         | 5       |
| <code>nnet</code> ( <code>nnet</code> [21])                             | <code>size</code>             | 1         | 13        | 7       |
|                                                                         | <code>decay</code>            | $10^{-4}$ | 1         | 6       |
|                                                                         | <code>ncomp</code>            | 1         | 5         | 5       |
| <code>gpls</code> ( <code>caret</code> [22])                            | <code>ncomp</code>            | 1         | 5         | 5       |
| <code>cart</code> ( <code>rpart</code> [23])                            | <code>cp</code>               | 0.001     | 0.1       | 5       |
| <code>c5.0</code> (C50 [24])                                            | <code>CF</code>               | 0         | 0.35      | 7       |
|                                                                         | <code>rules</code>            | FALSE     | TRUE      | 2       |
|                                                                         | <code>winnow</code>           | FALSE     | TRUE      | 2       |
| <code>rf</code> ( <code>ranger</code> [25])                             | <code>mtry</code>             | 4         | 100       | 7       |
|                                                                         | <code>min.node.size</code>    | 1         | 25        | 6       |
|                                                                         | <code>eta</code>              | 0.01      | 0.4       | 4       |
| <code>gbt</code> ( <code>xgboost</code> [26])                           | <code>max_depth</code>        | 1         | 3         | 3       |
|                                                                         | <code>colsample_bytree</code> | 0.2       | 1         | 5       |
|                                                                         | <code>min_child_weight</code> | 0.5       | 2         | 3       |
|                                                                         | <code>subsample</code>        | 0.2       | 1         | 3       |
|                                                                         | <code>nrounds</code>          | 50        | 250       | 3       |

Table 2: Value grid for hyperparameter tuning. \* = {*linear, polynomial, radial, sigmoid*}

## Supplementary C: best model

The classifier that induced the best model was `lasso` (AUC=0.87±0.04). For each feature selection iteration, Figure 1 shows a heatmap of model reliance ( $MR$ ) scores for all features. After iteration  $i = 1$ , 89 out of the 185 features were kept for model training in  $i = 2$ . The feature selection wrapper converges at  $i=7$  with a model that uses 6 features, each with a  $MR$  exceeding 1. Notably, the removal of 97% of features from  $i = 1$  to  $i = 7$  led to a much simpler model, while only dropping marginally in AUC (-0.02).

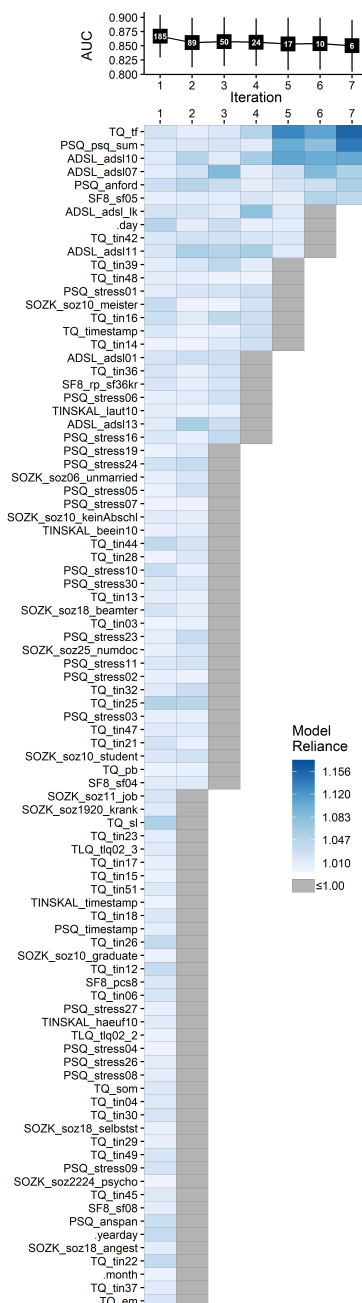

Figure 1: **MR convergence for lasso classifier.** Heatmap of retained and discarded features for each feature selection iteration for the `lasso` classifier. A blue-shaded cell represents a feature with a model reliance exceeding 1 whereas a grey cell represents a feature that was discarded from model training in the next iteration. The top subfigure shows AUC for the models of each iteration.

## References

- [1] Radloff, L. S. The CES-D scale: a self-report depression scale for research in the general population. *Applied psychological measurement* **1**, 385–401 (1977).
- [2] Hautzinger, M. & Bailer, M. ADS-Allgemeine Depressionskala. In *Diagnostische Verfahren in der Psychotherapie* (Beltz, 2003).
- [3] Fliege, H. *et al.* The Perceived Stress Questionnaire (PSQ) reconsidered: validation and reference values from different clinical and healthy adult samples. *Psychosomatic medicine* **67**, 78–88 (2005).
- [4] Bullinger, M. & Morfeld, M. Der SF-36 Health Survey. In *Gesundheitsökonomische Evaluationen*, 387–402 (Springer, 2008).
- [5] Goebel, G. & Hiller, W. *Tinnitus-Fragebogen:(TF); ein Instrument zur Erfassung von Belastung und Schweregrad bei Tinnitus; Handanweisung* (hogrefe, Verlag für Psychologie, 1998).
- [6] Goebel, G. & Hiller, W. Psychische Beschwerden bei chronischem Tinnitus: Erprobung und Evaluation des Tinnitus-Fragebogens (TF). *Verhaltenstherapie* **2**, 13–22 (1992).
- [7] Brüggemann, P. *et al.* Impact of multiple factors on the degree of tinnitus distress. *Frontiers in human neuroscience* **10**, 341 (2016).
- [8] Tibshirani, R. Regression shrinkage and selection via the lasso. *Journal of the Royal Statistical Society: Series B (Methodological)* **58**, 267–288 (1996).
- [9] Hechenbichler, K. & Schliep, K. Weighted k-nearest-neighbor techniques and ordinal classification. In *SFB 386, Ludwig-Maximilians University, Munich*, vol. 399 of *sfb386* (2004). URL <http://nbn-resolving.de/urn/resolver.pl?urn=nbn:de:bvb:19-epub-1769-9>.
- [10] Boser, B. E., Guyon, I. M. & Vapnik, V. N. A training algorithm for optimal margin classifiers. In *Proc. of Workshop on Computational Learning Theory*, 144–152 (ACM, 1992).
- [11] Venables, W. N. & Ripley, B. D. *Modern Applied Statistics with S* (Springer, 2002), fourth edn.
- [12] Ding, B. & Gentleman, R. Classification using generalized partial least squares. *Journal of Computational and Graphical Statistics* **14**, 280–298 (2005).
- [13] Breiman, L., Friedman, J., Olshen, R. & Stone, C. *Classification and Regression Trees* (Wadsworth and Brooks, 1984).
- [14] Quinlan, R. *C4.5: Programs for Machine Learning* (Morgan Kaufmann Publishers, San Mateo, CA, 1993).
- [15] Breiman, L. Random forests. *Machine learning* **45**, 5–32 (2001).
- [16] Friedman, J. H. Greedy function approximation: a gradient boosting machine. *Annals of Statistics* 1189–1232 (2001).
- [17] R Core Team. *R: A Language and Environment for Statistical Computing*. R Foundation for Statistical Computing, Vienna, Austria (2018). URL <https://www.r-project.org/>.
- [18] Bischl, B. *et al.* mlr: Machine Learning in R. *The Journal of Machine Learning Research* **17**, 5938–5942 (2016).
- [19] Friedman, J., Hastie, T. & Tibshirani, R. Regularization paths for generalized linear models via coordinate descent. *Journal of Statistical Software* **33**, 1–22 (2010). URL <http://www.jstatsoft.org/v33/i01/>.
- [20] Dimitriadou, E., Hornik, K., Leisch, F., Meyer, D. & Weingessel, A. e1071: Misc Functions of the Department of Statistics (e1071), TU Wien. R package version 1.5-25. (2011). URL <http://cran.r-project.org/package=e1071>.



- [21] Venables, W. N. & Ripley, B. D. *Modern Applied Statistics with S* (Springer, New York, 2002), fourth edn. URL <http://www.stats.ox.ac.uk/pub/MASS4>. ISBN 0-387-95457-0.
- [22] Kuhn, M. Building Predictive Models in R Using the caret Package. *Journal of Statistical Software, Articles* **28**, 1–26 (2008). URL <https://www.jstatsoft.org/v028/i05>.
- [23] Therneau, T. & Atkinson, B. *rpart: Recursive Partitioning and Regression Trees* (2018). URL <https://CRAN.R-project.org/package=rpart>. R package version 4.1-13.
- [24] Kuhn, M. & Quinlan, R. *C50: C5.0 Decision Trees and Rule-Based Models* (2018). URL <https://CRAN.R-project.org/package=C50>. R package version 0.1.2.
- [25] Wright, M. N. & Ziegler, A. ranger: A fast implementation of random forests for high dimensional data in C++ and R. *Journal of Statistical Software* **77**, 1–17 (2017).
- [26] Chen, T. & Guestrin, C. XGBoost: A Scalable Tree Boosting System. In *Proc. of ACM SIGKDD International Conference on Knowledge Discovery and Data Mining*, 785–794 (ACM, New York, NY, USA, 2016). URL <http://doi.acm.org/10.1145/2939672.2939785>.
